# Supplementary material for: Anti-cancer activity and mechanism of flurbiprofen organoselenium compound RY-1-92 in non-small cell lung cancer
Source: Royal Society of Chemistry journal article supplement (doi:10.1039/d4md00058g), 2024-01-01
Supplement: d4md00058g1.xlsx [file d4md00058g1.xlsx]

## Sheet: Sheet1
Potential targets of RY-1-92 predicted by the Super-PRED database
Target Name	ChEMBL-ID	UniProt ID	PDB Visualization	TTD ID	Probability	Model accuracy
Cathepsin D	CHEMBL2581	P07339	4OD9	T67102	0.9946	0.9895
DNA-(apurinic or apyrimidinic site) lyase	CHEMBL5619	P27695	6BOW	T13348	0.9793	0.9111
Nuclear factor NF-kappa-B p105 subunit	CHEMBL3251	P19838	1SVC	Not Available	0.974	0.9609
Tyrosyl-DNA phosphodiesterase 1	CHEMBL1075138	Q9NUW8	6N0D	Not Available	0.9307	0.7122
Glycine transporter 2	CHEMBL3060	Q9Y345	Not Available	Not Available	0.9165	0.9917
Cyclooxygenase-1	CHEMBL221	P23219	6Y3C	Not Available	0.914	0.9017
Bloom syndrome protein	CHEMBL1293237	P54132	4O3M	Not Available	0.9105	0.7006
Transcription intermediary factor 1-alpha	CHEMBL3108638	O15164	4YBM	Not Available	0.9055	0.9556
Histone deacetylase 4	CHEMBL3524	P56524	2VQM	T63816	0.8959	0.9297
Kruppel-like factor 5	CHEMBL1293249	Q13887	Not Available	Not Available	0.8928	0.8633
Nuclear factor erythroid 2-related factor 2	CHEMBL1075094	Q16236	2FLU	Not Available	0.8888	0.96
Pregnane X receptor	CHEMBL3401	O75469	6TFI	T82702	0.8686	0.9473
Neuronal acetylcholine receptor; alpha4/beta4	CHEMBL1907591	P30926	6UR8	T70967	0.8674	1
Free fatty acid receptor 1	CHEMBL4422	O14842	5TZR	Not Available	0.8654	0.9333
Neuronal acetylcholine receptor; alpha3/beta4	CHEMBL1907594	P30926	6PV7	T73724	0.8622	0.9723
Glycine receptor subunit alpha-1	CHEMBL5845	P23415	4X5T	T50269	0.8373	0.9071
ADAM10	CHEMBL5028	O14672	6BE6	T31902	0.837	0.975
Lipoxin A4 receptor	CHEMBL4227	P25090	6OMM	Not Available	0.806	1
G-protein coupled receptor 55	CHEMBL1075322	Q9Y2T6	Not Available	T87670	0.8019	0.7815
Monoamine oxidase B	CHEMBL2039	P27338	1S3E	Not Available	0.7945	0.9251
Nuclear receptor ROR-beta	CHEMBL3091268	Q92753	Not Available	Not Available	0.7931	0.955
Caspase-6	CHEMBL3308	P55212	2WDP	Not Available	0.7858	0.9756
Proteasome subunit beta type-9	CHEMBL1944495	P28065	6E5B	Not Available	0.7744	0.975
Transmembrane protease serine 6	CHEMBL1795139	Q8IU80	Not Available	Not Available	0.7716	0.9833
Muscarinic acetylcholine receptor M1	CHEMBL216	P11229	6OIJ	T28893	0.7659	0.9423
Histone deacetylase 5	CHEMBL2563	Q9UQL6	5UWI	Not Available	0.7633	0.8967
MAP kinase p38 beta	CHEMBL3961	Q15759	3GP0	Not Available	0.7624	0.9475
Adenosine A1 receptor	CHEMBL226	P30542	5N2S	T92072	0.7607	0.9593
Dipeptidyl peptidase IX	CHEMBL4793	Q86TI2	6EOR	Not Available	0.7467	0.9695
Proteasome component C5	CHEMBL4208	P20618	6KWY	Not Available	0.7457	0.9
Glucose transporter	CHEMBL2535	P11166	6THA	Not Available	0.7424	0.9875
Proteasome Macropain subunit	CHEMBL3492	P49721	5LE5	Not Available	0.7285	0.9024
DNA topoisomerase II alpha	CHEMBL1806	P11388	6ZY5	T17048	0.7279	0.89
Glutamate NMDA receptor; GRIN1/GRIN2B	CHEMBL1907603	Q05586	5EWM	Not Available	0.7243	0.9589
Protein Mdm4	CHEMBL1255126	O15151	6Q9Y	T36741	0.7164	0.902
Glutathione S-transferase Pi	CHEMBL3902	P09211	5J41	T21669	0.7151	0.9381
Sodium channel protein type III alpha subunit	CHEMBL5163	Q9NY46	Not Available	T76937	0.7106	0.969
Dual specificity phosphatase Cdc25C	CHEMBL2378	P30307	3OP3	Not Available	0.7073	0.9667
Adenosylhomocysteinase	CHEMBL2664	P23526	1LI4	Not Available	0.7072	0.8667
Choline kinase alpha	CHEMBL3117	P35790	4DA5	T55709	0.7061	0.78
Tyrosine-protein kinase FYN	CHEMBL1841	P06241	2DQ7	T17980	0.7054	0.8129
Cyclin-dependent kinase 5/CDK5 activator 1	CHEMBL1907600	Q00535	1UNL	T20973	0.7039	0.9303
Thyroid hormone receptor alpha	CHEMBL1860	P10827	3ILZ	T79591	0.6972	0.9915
Voltage-gated N-type calcium channel alpha-1B subunit	CHEMBL4478	Q00975	Not Available	T38338	0.6949	0.9714
Signal transducer and activator of transcription 3	CHEMBL4026	P40763	6QHD	T29130	0.6941	0.8269
Neurotensin receptor 2	CHEMBL2514	O95665	Not Available	Not Available	0.6761	1
Formyl peptide receptor 1	CHEMBL3359	P21462	Not Available	T87831	0.6742	0.9356
Prostanoid EP1 receptor	CHEMBL1811	P34995	Not Available	T15497	0.6697	0.9571
Kinesin-like protein 1	CHEMBL4581	P52732	6TIW	T28484	0.6637	0.9318
Ribosomal protein S6 kinase alpha 1	CHEMBL2553	Q15418	2Z7Q	Not Available	0.6619	0.8511
MAP kinase p38 alpha	CHEMBL260	Q16539	2FST	Not Available	0.6604	0.9778
Serine/threonine-protein kinase ULK1	CHEMBL6006	O75385	4WNO	Not Available	0.658	0.76
Bile acid receptor FXR	CHEMBL2047	Q96RI1	6HL1	Not Available	0.6565	0.961
Dipeptidyl peptidase II	CHEMBL3976	Q9UHL4	4EBB	Not Available	0.6537	0.9229
Calpain 1	CHEMBL3891	P07384	1ZCM	Not Available	0.6519	0.9304
Glycine transporter 1	CHEMBL2337	P48067	6ZBV	T69685	0.6516	0.9545
Lysosomal Pro-X carboxypeptidase	CHEMBL2335	P42785	3N2Z	Not Available	0.6464	1
Signal transducer and activator of transcription 1-alpha/beta	CHEMBL6101	P42224	1YVL	T64205	0.6431	0.7262
Sphingosine 1-phosphate receptor Edg-3	CHEMBL3892	Q99500	7C4S	T11241	0.6359	0.9729
Serotonin 2a (5-HT2a) receptor	CHEMBL224	P28223	6WHA	T32060	0.631	0.9143
Vanilloid receptor	CHEMBL4794	Q8NER1	6L93	T83193	0.6294	0.9897
Estrogen receptor beta	CHEMBL242	Q92731	1QKM	T80896	0.6276	0.9835
Protein-tyrosine phosphatase 1B	CHEMBL335	P18031	5QGF	Not Available	0.623	0.9517
Histone deacetylase 7	CHEMBL2716	Q8WUI4	3C10	Not Available	0.6225	0.8944
PI3-kinase p110-delta subunit	CHEMBL3130	O00329	6PYR	T67849	0.6222	0.9647
Serine/threonine-protein kinase TAO1	CHEMBL5261	Q7L7X3	Not Available	Not Available	0.6205	0.8933
Kallikrein 7	CHEMBL2443	P49862	2QXI	Not Available	0.6196	0.94
Casein kinase II alpha/beta	CHEMBL3038477	P67870	6TLS	T51565	0.6173	0.9923
Sphingosine 1-phosphate receptor Edg-8	CHEMBL2274	Q9H228	Not Available	T50089	0.6083	1
Cathepsin K	CHEMBL268	P43235	5Z5O	T11388	0.6072	0.9685
Histone acetyltransferase KAT6A	CHEMBL3774298	Q92794	2OZU	Not Available	0.6056	0.975
AMP-activated protein kinase, alpha-1 subunit	CHEMBL4045	Q13131	6C9H	Not Available	0.6048	0.735
Cannabinoid CB1 receptor	CHEMBL218	P21554	6N4B	Not Available	0.6048	0.9661
WD repeat-containing protein 5	CHEMBL1075317	P61964	2GNQ	Not Available	0.6039	0.9633
Apelin receptor	CHEMBL1628481	P35414	5VBL	T65783	0.6032	0.9789
Carbonic anhydrase III	CHEMBL2885	P07451	3UYQ	Not Available	0.6008	0.8745
Dipeptidyl peptidase VIII	CHEMBL4657	Q6V1X1	6EOP	Not Available	0.5985	0.9721
Peptidyl-prolyl cis-trans isomerase NIMA-interacting 1	CHEMBL2288	Q13526	1PIN	T16308	0.598	0.9171
Methionine aminopeptidase 2	CHEMBL3922	P50579	1B6A	T75596	0.5914	0.9728
Endoplasmic reticulum aminopeptidase 1	CHEMBL5939	Q9NZ08	6Q4R	Not Available	0.5914	1
C-C chemokine receptor type 1	CHEMBL2413	P32246	Not Available	T16016	0.5857	0.895
Dihydrofolate reductase	CHEMBL202	P00374	1KMV	T17345	0.5835	0.8992
Glyoxalase I	CHEMBL2424	Q04760	3W0T	Not Available	0.5803	0.9167
FML2_HUMAN	CHEMBL5646	Q6L5J4	Not Available	Not Available	0.5802	1
Muscarinic acetylcholine receptor M3	CHEMBL245	P20309	Not Available	T67684	0.5789	0.9753
Acyl-CoA desaturase	CHEMBL5555	O00767	4ZYO	T10897	0.5784	0.975
C-C chemokine receptor type 2	CHEMBL4015	P41597	5T1A	T89988	0.5771	0.9857
Dual specificity phosphatase Cdc25B	CHEMBL4804	P30305	1QB0	Not Available	0.5716	0.795
C5a anaphylatoxin chemotactic receptor	CHEMBL2373	P21730	6C1R	T15439	0.5715	0.9262
Nitric oxide synthase, inducible	CHEMBL4481	P35228	3E7G	T02703	0.5704	0.948
T-cell protein-tyrosine phosphatase	CHEMBL3807	P17706	1L8K	Not Available	0.567	0.93
Serine/threonine-protein kinase MST2	CHEMBL4708	Q13188	6AO5	Not Available	0.5668	0.7167
Acetylcholine receptor; alpha1/beta1/delta/gamma	CHEMBL1907588	P02708	5HBT	T04689	0.5636	0.9833
Tyrosine-protein kinase Lyn	CHEMBL3905	P07948	5XY1	Not Available	0.5596	0.7553
Histone deacetylase 9	CHEMBL4145	Q9UKV0	Not Available	Not Available	0.558	0.8549
Tyrosine-protein kinase FRK	CHEMBL4223	P42685	Not Available	Not Available	0.5572	0.7125
Dual specificity mitogen-activated protein kinase kinase 2	CHEMBL2964	P36507	1S9I	Not Available	0.5506	0.8
Beta-glucosidase	CHEMBL3761	Q9HCG7	Not Available	Not Available	0.5482	0.99
Galectin-3	CHEMBL4531	P17931	6FOF	T72038	0.5482	0.969
Fatty acid binding protein adipocyte	CHEMBL2083	P15090	3P6D	Not Available	0.5477	0.9571
Multidrug resistance-associated protein 1	CHEMBL3004	P33527	4C3Z	T11288	0.5456	0.9637
Potassium channel subfamily K member 9	CHEMBL2321614	Q9NPC2	6GHP	Not Available	0.5434	0.8
Cyclin-dependent kinase 5	CHEMBL4036	Q00535	4AU8	T20973	0.5399	0.7909
Sodium/glucose cotransporter 1	CHEMBL4979	P13866	Not Available	Not Available	0.5392	0.9824
Adenosine A3 receptor	CHEMBL256	P0DMS8	Not Available	T36059	0.5378	0.9593
Excitatory amino acid transporter 2	CHEMBL4973	P43004	Not Available	Not Available	0.5372	0.9875
Cystic fibrosis transmembrane conductance regulator	CHEMBL4051	P13569	6MSM	T55654	0.5371	0.9571
Muscarinic acetylcholine receptor M5	CHEMBL2035	P08912	6OL9	T79961	0.5366	0.9462
Sphingosine 1-phosphate receptor Edg-6	CHEMBL3230	O95977	Not Available	Not Available	0.5321	0.9401
Tyrosine-protein kinase TEC	CHEMBL4246	P42680	Not Available	Not Available	0.5313	0.8205
Tissue-type plasminogen activator	CHEMBL1873	P00750	1RTF	T45299	0.5311	0.9333
Endoplasmic reticulum-associated amyloid beta-peptide-binding protein	CHEMBL4159	Q99714	2O23	Not Available	0.5294	0.7016
Ribosomal protein S6 kinase alpha 6	CHEMBL4924	Q9UK32	6G77	Not Available	0.5286	0.8
LXR-beta	CHEMBL4093	P55055	4NQA	T13714	0.5262	0.95
Excitatory amino acid transporter 3	CHEMBL2721	P43005	6X2L	Not Available	0.525	0.935
Acyl coenzyme A:cholesterol acyltransferase 1	CHEMBL2782	P35610	6P2J	Not Available	0.524	0.9165
PI3-kinase p110-beta subunit	CHEMBL3145	P42338	Not Available	T05031	0.522	0.9875
PI3-kinase p110-alpha/p85-alpha	CHEMBL2111367	P27986	4JPS	T80276	0.5185	0.9433
Adenosine A2b receptor	CHEMBL255	P29275	Not Available	T86679	0.5181	0.9859
Tyrosine-protein kinase FER	CHEMBL3982	P16591	6KC4	Not Available	0.5173	0.7811
Tissue factor pathway inhibitor	CHEMBL3713062	P10646	5NMV	T78890	0.5166	0.9733
Lysine-specific demethylase 6B	CHEMBL1938211	O15054	6F6D	Not Available	0.516	0.8333
Caspase-8	CHEMBL3776	Q14790	4JJ7	T15700	0.5156	0.9706
P2X purinoceptor 7	CHEMBL4805	Q99572	Not Available	T63414	0.5145	0.975
Geranylgeranyl pyrophosphate synthetase	CHEMBL4769	O95749	6R4V	Not Available	0.508	0.9208
Amine oxidase, copper containing	CHEMBL3437	Q16853	2C10	T69619	0.5069	0.94
Non-receptor tyrosine-protein kinase TNK1	CHEMBL5334	Q13470	Not Available	Not Available	0.5065	0.7333
Vitamin K-dependent protein C	CHEMBL4444	P04070	6M3B	T24836	0.506	0.9389
Platelet-derived growth factor receptor alpha	CHEMBL2007	P16234	7LBF	T53524	0.5058	0.9107
Sodium/hydrogen exchanger 1	CHEMBL2781	P19634	7DSX	T82028	0.5037	0.9024
Cysteinyl leukotriene receptor 2	CHEMBL4330	Q9NS75	Not Available	T74238	0.5002	0.98
