# Supplementary material for: Anti-cancer activity and mechanism of flurbiprofen organoselenium compound RY-1-92 in non-small cell lung cancer
Source: Royal Society of Chemistry journal article supplement (doi:10.1039/d4md00058g), 2024-01-01
Supplement: d4md00058g2.pdf [file d4md00058g2.pdf]

**Supporting Information Figure S1.** The inhibitory effect of RY-1-92 on intestinal epithelial cells NCM460. 5-FU and sulindac were used as positive control. Data are the means  $\pm$  SEMs. \* $P < 0.05$ , \*\* $P < 0.01$  and \*\*\* $P < 0.001$  compared to the control group.

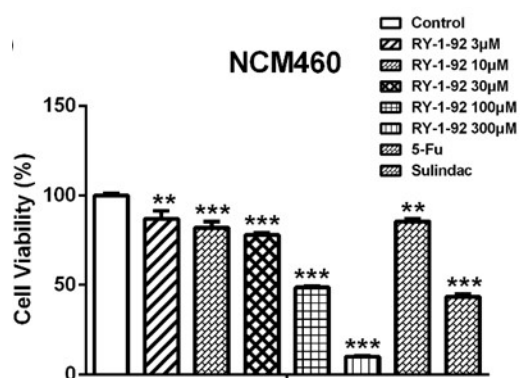

**Supporting Information Figure S2.** The number of predicted targets shared by Super-SEED and SEA in Venn diagram.

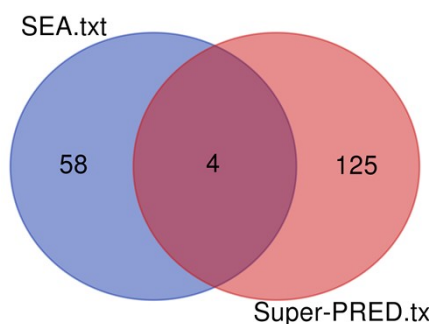

**Supporting Information Table S1.** Details of the four targets predicted by Super-SEED and SEA

| Target Name                      | UniProt ID | PDB Visualization | Probability | Model accuracy |
|----------------------------------|------------|-------------------|-------------|----------------|
| WD repeat-containing protein 5   | P61964     | 2GNQ              | 60.39%      | 96%            |
| Lysosomal Pro-X carboxypeptidase | P42785     | 3N2Z              | 61.64%      | 99%            |
| Cathepsin K                      | P43235     | 5Z5O              | 60.72%      | 97%            |
| Vanilloid receptor               | Q8NER1     | 6L93              | 62.94%      | 99%            |
