# Supplementary material for: Anti-cancer activity and mechanism of flurbiprofen organoselenium compound RY-1-92 in non-small cell lung cancer
Source: Royal Society of Chemistry journal article supplement (doi:10.1039/d4md00058g), 2024-01-01

## HPLC Traces of RY-1-92:

### Single injection report

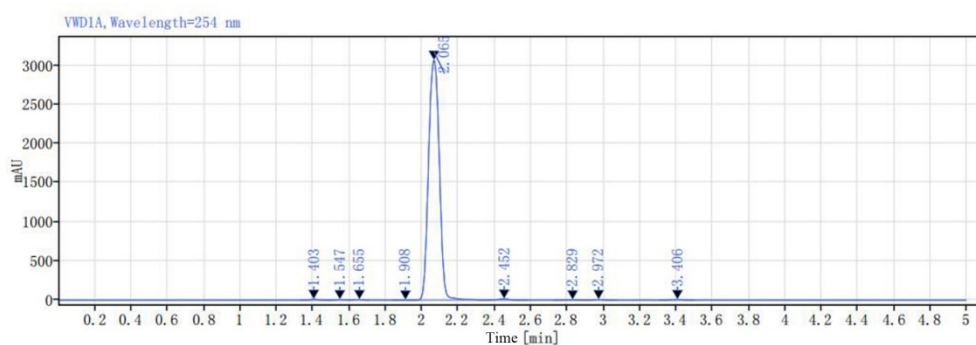

Signal: VWD1A, Wavelength=254 nm

#### Retention time

| (min) | Type | Peak width | Peak area | Height  | Peak area% |
|-------|------|------------|-----------|---------|------------|
| 1.403 | VB   | 0.16       | 33.66     | 10.67   | 0.26       |
| 1.547 | BV   | 0.12       | 23.61     | 6.39    | 0.18       |
| 1.655 | VV   | 0.11       | 25.70     | 6.87    | 0.20       |
| 1.908 | BB   | 0.12       | 5.62      | 1.93    | 0.04       |
| 2.065 | BV   | 0.39       | 12614.64  | 3066.13 | 98.08      |
| 2.452 | VV   | 0.23       | 67.27     | 13.83   | 0.52       |
| 2.829 | BV   | 0.16       | 21.46     | 3.64    | 0.17       |
| 2.972 | VB   | 0.17       | 31.55     | 7.24    | 0.25       |
| 3.406 | VV   | 0.19       | 38.51     | 8.37    | 0.30       |
|       | Sum: |            | 12862.02  |         |            |

**<sup>1</sup>H NMR spectra for RY-1-92:**

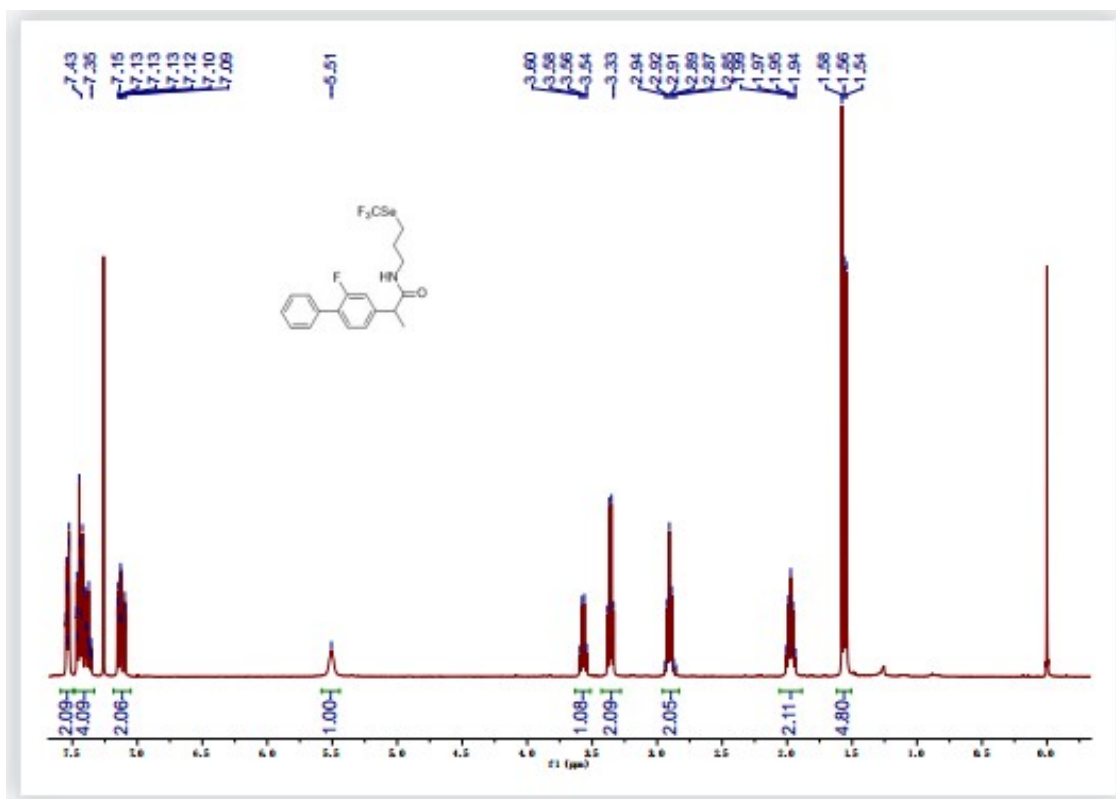

### <sup>13</sup>C NMR spectra for RY-1-92:

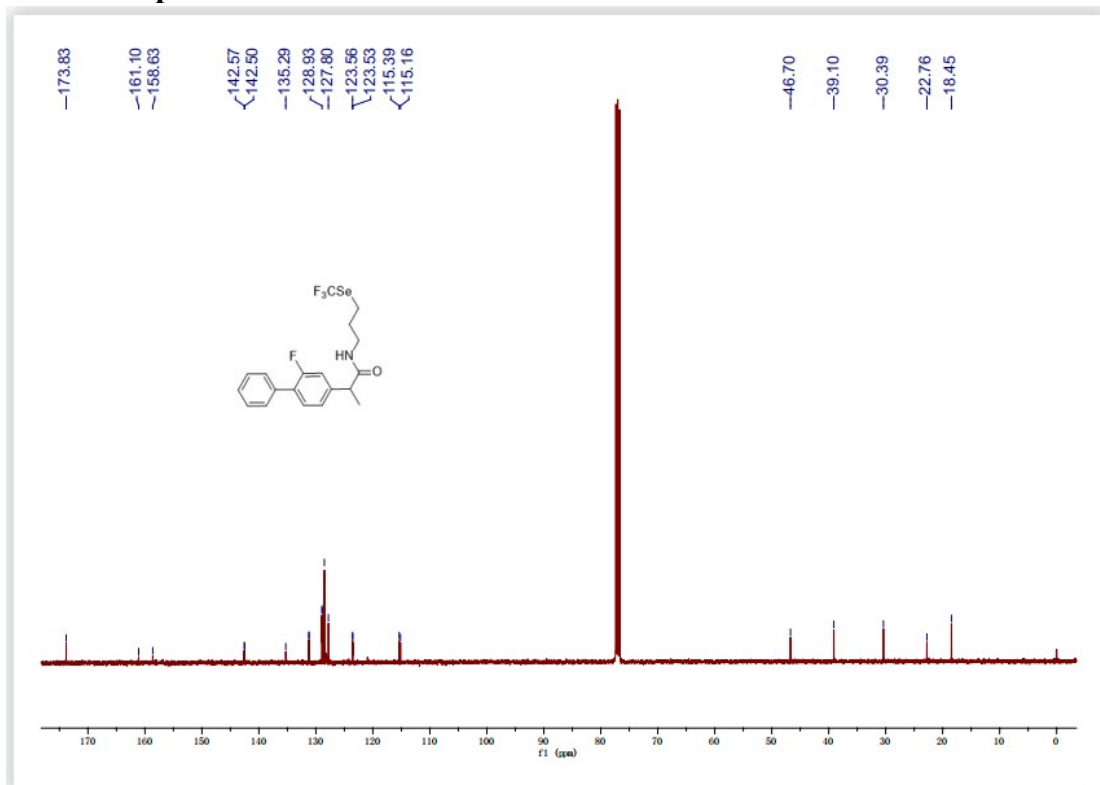

**<sup>19</sup>F NMR spectra for RY-1-92:**

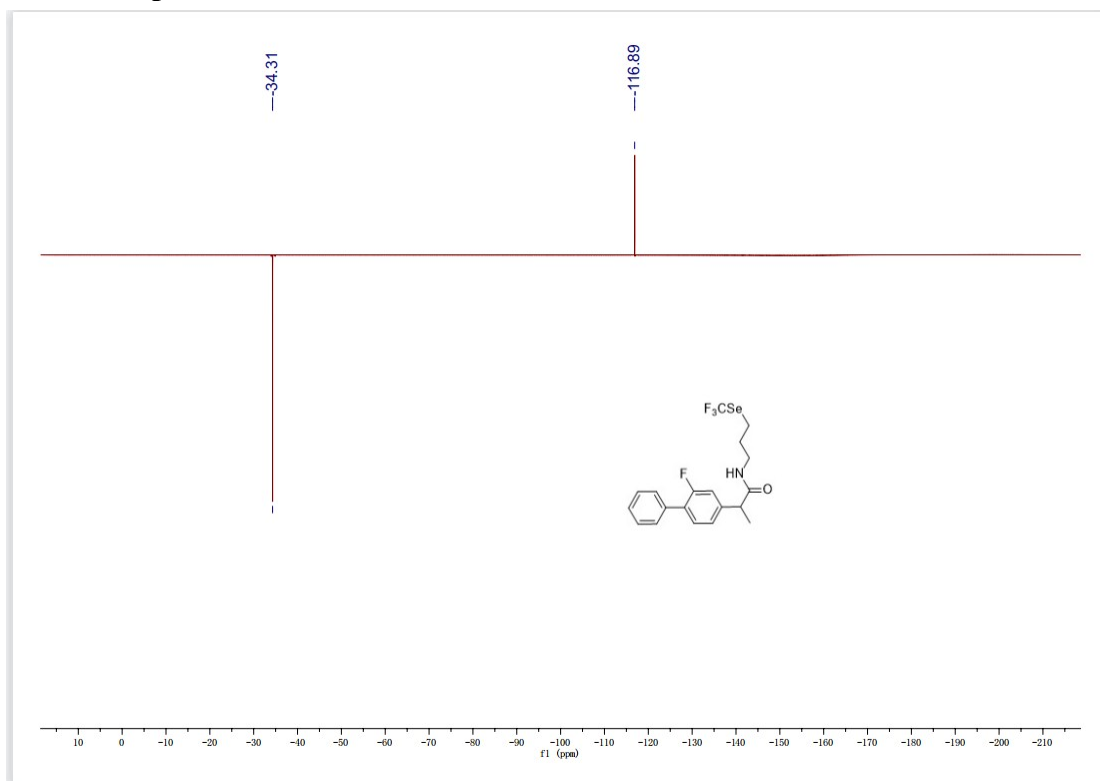

# MS spectra for RY-1-92:

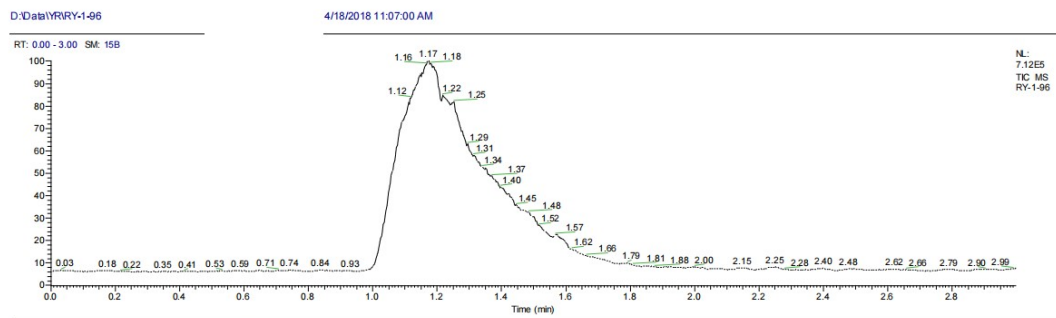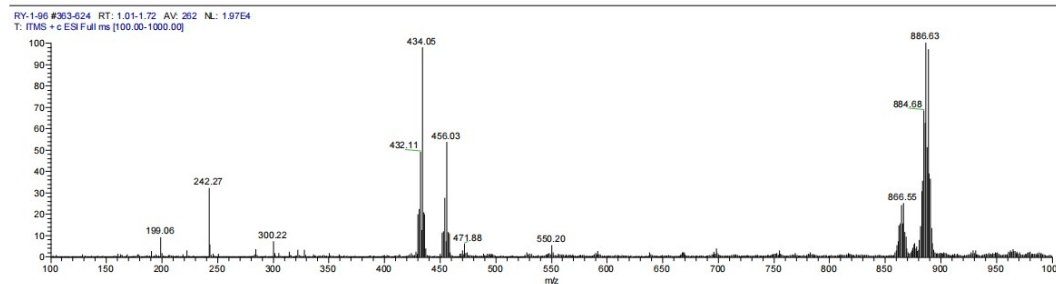

Supplement: d4md00058g3.pdf [file d4md00058g3.pdf]
